# Supplementary material for: Population structure, biogeography and transmissibility of Mycobacterium tuberculosis
Source: PubMed Central journal article supplement (PMC8528816; doi:10.1038/s41467-021-26248-1), 2021-10-20
Supplement: 41467_2021_26248_MOESM2_ESM.pdf [file 41467_2021_26248_MOESM2_ESM.pdf]

## Peer Review File

---

Title: Population structure, biogeography and transmissibility of *Mycobacterium tuberculosis*

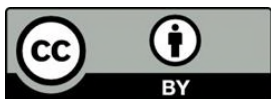

**Open Access** This file is licensed under a Creative Commons Attribution 4.0

International License, which permits use, sharing, adaptation, distribution and reproduction in any medium or format, as long as you give appropriate credit to

the original author(s) and the source, provide a link to the Creative Commons license, and indicate if changes were made. In the cases where the authors are anonymous, such as is the case for the reports of anonymous peer reviewers, author attribution should be to 'Anonymous Referee' followed by a clear attribution to the source work. The images or other third party material in this file are included in the article's Creative Commons license, unless indicated otherwise in a credit line to the material. If material is not included in the article's Creative Commons license and your intended use is not permitted by statutory regulation or exceeds the permitted use, you will need to obtain permission directly from the copyright holder. To view a copy of this license, visit <http://creativecommons.org/licenses/by/4.0/>.

## <b>REVIEWER COMMENTS</B>

### Reviewer #1 (Remarks to the Author):

Freschi et al describe a high-resolution analysis of global population structure of *Mycobacterium tuberculosis* (Mtb) across 4 main lineages, L1-L4. They describe new sub-lineages and 'internal groups' (internal to sub-lineages) within these previously described lineages, hence refining previous Mtb phylogenies. They reveal new geographically restricted lineages that they suggest further support evidence for coevolution between the pathogen and human populations. An augmented set of 95 single nucleotide substitutions (SNS) are proposed that will facilitate designation of *M. tuberculosis* isolates into their respective lineages/sub-lineages.

The manuscript describes a robust computational approach from which a refined Mtb phylogeny was produced. This extra resolution as compared to the existing phylogenies will be of interest and utility to the TB field. However, I have some comments that I would like to see addressed.

#### Major comments

1. The naming convention suggested in the manuscript is cumbersome. For example, their new system would replace the current lineage designations 4.3/LAM and 4.10/PGG with 4.2.1.2.1.1 and 4.2.1.1.1.1.1.1; the latter hardly trip off the tongue, while the former designations have the advantage of at least being easier to articulate. Furthermore, long strings of numbers are prone to typographical errors. To ensure wide uptake of a new naming convention by the field and clinical/diagnostic labs, I would urge the authors to rethink their nomenclature. I realise that the authors are following previous convention, but the extra resolution of their system, (with no doubt increased future resolution as more Mtb isolates are sequenced globally), risks a slippery slope of expanded bifurcations leading to unwieldy number strings.
2. The brevity of the discussion does not provide sufficient interpretation or context for the work. For example, the identification of the geographically restricted 1.1.1.2.i1 internal group in Malawi is interesting, but do the authors have any hypothesis as to why the lineage is so localised? At the moment the finding is just stated with only superficial interpretation.
3. In a similar vein, the evidence for geographical restriction of lineages being a function of co- evolution of the pathogen with local human populations is merely repeating an oft stated observation from others. Given that the target journal is Nat Comms, I would like to have seen some attempt at providing more evidence that could substantiate these claims. Instead we are told that "confirmation of this observation requires control for TB exposure and differences in contact networks using epidemiological data". I think we all realise that there is a need for epi metadata to substantiate these claims, which is why it would be good to provide it. Of course, the availability of (good) metadata is one of the major constraints in placing pathogen wgs data in a broader context, but it would have been nice to know whether the authors have tried to obtain such epi data, or their plans to explore this.

#### Minor

1. As a case in point re by point above, the ease of making a 'number' error is shown in the Introduction where the authors state "We identify and validate 22 novel sub-lineages and 8 additional internal groups, including 6 in L1 and 4 in L3..", while in the Discussion we are told "We describe 7 and 4 new sub-lineages/internal groups, respectively, for (L1 and L3)". Is it 6 or 7 new sub-lineages in L1? I believe it is 6.
2. The lack of line numbers on the manuscript makes it difficult for a reviewer to highlight areas needing correction/comments.
3. There are some typos in the References (e.g. 6, 7, 40)

#### Reviewer #2 (Remarks to the Author):

In Freschi et al, the authors used multiple datasets of previously published whole genomes of *M. tuberculosis* clinical isolates and performed various analyses to refine the phylogeny of this important pathogen. In particular, this work extends prior understanding of *M. tuberculosis* phylogeny and population structure with respect to sublineages and define additional sub-lineages and internal groups that had previously not been named. They propose a rational nomenclature for *M. tuberculosis* sublineages, and identify a single nucleotide substitution (SNS) that can be used to identify these sublineages for future analyses. Lastly, they performed a terminal branch length analysis of *Mtb* lineages 1-4, and extrapolate differential branch length findings to transmissibility these lineages.

While much of the analyses are descriptive, this paper does modestly improve our current understanding of the TB phylogeny and propose a useful tool for sublineage nomenclature. There are a few clarifications that would enhance this manuscript in its current form.

#### Major comments:

1. Even in a seemingly large dataset of over 10K *Mtb* isolates, when over 1 million people on the planet are known to have TB disease each year, there are issues with sampling biases that must be considered. This is a particular issue in this study, which utilizes only previously published genomes that have been sequenced for other purposes. While the authors acknowledge that sampling bias is a limitation, it is not clear that sampling bias has been minimized. For example, how was this sampling issue addressed in the distribution of terminal branch length analysis?
2. Inclusion of a summary table of the *M. tuberculosis* isolates included in each analysis of this study would be helpful to understand the total numbers of isolates from each prior investigation, from each country, the distribution of drug-resistant strains, and distribution of lineages and sublineages to allow the reader to understand the sampling and potential biases. While some of this information is embedded within supplemental Files 1, 4 and 5, these are currently unwieldy and require the reader to tabulate summary numbers of interest.

Minor comments:

1. It would be helpful to include a table of the new sublineage naming system to prior naming systems to ease the comparison with the published literature
2. The conclusion that L4 is as or more transmissible than L2 raises more questions than answers as this appears to differ from the conclusions of other published studies that are cited herein on the global dominance of the Beijing strains.

Reviewer #3 (Remarks to the Author):

The manuscript reads well and it represents a real advance in the TB molecular epidemiology and phylogeography field.

Important notions are discussed, and newly defined TB sub-lineages are proposed.

However, I have a few minor remarks:

On page 5 (line 166) Please be more precise about the "species other than Mtb".

It would be great to provide geographic (or country) distribution for each identified SNS TB sub-lineage. It is not clear how the "fast-lineage-caller" has been validated and compared to other tools. Could you please provide a supplemental table for it?

On page 8 (line 290) "... one from South-East Asia" (please be more precise on the location).

Page 9, lines 336-337, could you please provide the corresponding lineage for each NCBI Reference sequence (NC...../L1, NC...../L2, ...)

Furthermore, regarding data on L1 and L3, it would be interesting to mention recent studies on the subject (<https://doi.org/10.1101/2020.10.20.346866> , <https://doi.org/10.1371/journal.pone.0219706> , <https://doi.org/10.1111/mec.15120>)

1 **Response to Referees (NCOMMS-20-41049A)**

2  
3 We thank the reviewers for their constructive comments and suggestions. Here we address one  
4 by one all their comments and provide our answers.

5  
6  
7 Reviewer #1 (Remarks to the Author):

8  
9 Freschi et al describe a high-resolution analysis of global population structure of Mycobacterium  
10 tuberculosis (Mtb) across 4 main lineages, L1-L4. They describe new sub-lineages and ‘internal  
11 groups’ (internal to sub-lineages) within these previously described lineages, hence refining  
12 previous Mtb phylogenies. They reveal new geographically restricted lineages that they suggest  
13 further support evidence for coevolution between the pathogen and human populations. An  
14 augmented set of 95 single nucleotide substitutions (SNS) are proposed that will facilitate  
15 designation of M. tuberculosis isolates into their respective lineages/sub-lineages.

16  
17 The manuscript describes a robust computational approach from which a refined Mtb phylogeny  
18 was produced. This extra resolution as compared to the existing phylogenies will be of interest  
19 and utility to the TB field. However, I have some comments that I would like to see addressed.

20  
21 Major comments

22 1. The naming convention suggested in the manuscript is cumbersome. For example, their new  
23 system would replace the current lineage designations 4.3/LAM and 4.10/PGG with 4.2.1.2.1.1  
24 and 4.2.1.1.1.1.1.1; the latter hardly trip off the tongue, while the former designations have the  
25 advantage of at least being easier to articulate. Furthermore, long strings of numbers are prone  
26 to typographical errors. To ensure wide uptake of a new naming convention by the field and  
27 clinical/diagnostic labs, I would urge the authors to rethink their nomenclature. I realise that the  
28 authors are following previous convention, but the extra resolution of their system, (with no doubt  
29 increased future resolution as more Mtb isolates are sequenced globally), risks a slippery slope  
30 of expanded bifurcations leading to unwieldy number strings.

31  
32 **Author's Response:**

33 In our work we propose a hierarchical naming system for Mtb, which has the advantages of  
34 directly communicating the phylogenetic relationships between groups, and automating the  
35 process of lineage classification when new isolates are considered. The hierarchical naming  
36 scheme does have, as the reviewer points out, the disadvantage of long names (in particular for  
37 L4) due to the complex phylogeny. We acknowledge that long names may be difficult to remember  
38 by human scientists, and prone to errors if handled manually.

39  
40 We believe that the advantages of the hierarchical naming scheme overall outweigh its  
41 disadvantages since:

- 42 - The main naming system currently in use, *i.e.* Coll *et al.*, already contains designations  
43 that describe five subdivisions (e.g. 4.2.1.2.1). Simply extending such a naming system  
44 using our new results, which results in adding new groups, readily leads to designations

45 with seven subdivisions. In addition, the number of subdivisions is expected to grow with  
46 time, potentially leading to the same issues raised for the hierarchical naming system  
47 (which currently has a maximum of eleven subdivisions).

48 - People already use spoligotypes, which are long strings of zeros and ones, to type *Mtb*  
49 strains and share them with the community. Spoligotypes are organized in families, to  
50 make it easier for the end users to understand which group the spoligotype designates. In  
51 the case of SNS there could be a shorthand naming system for everyday use and a  
52 systematic one to work with the details.

53  
54 To address the reviewer's appropriate concern about naming length we now revise the naming to  
55 a new shorthand lineage naming scheme that's based on the Coll *et al.* naming scheme. We  
56 basically extend the Coll *et al.* lineage designations, but try to retain some of the concepts  
57 developed for the hierarchical naming system specifically the internal groups (groups which have  
58 ancestor nodes where the topology of the tree cannot be fully resolved). These lineage  
59 designations are shorter than the hierarchical scheme, in particular for L4 strains. This means  
60 that the group 4.3.3 in Coll *et al.* (a schema that does not distinguish between true sub-lineages  
61 and internal groups) is now named 4.3.i3 as the tree topology in fact does not support one or  
62 more of its ancestor nodes. Also, 4.10 remains with the same designation as Coll *et al.* instead of  
63 4.2.1.1.1.1.1.1, improving the overall readability. For L1-3 isolates the designations are almost  
64 interchangeable with the hierarchical nomenclature, thus allowing quick phylogenetic  
65 comparisons.

66  
67 We would like to note that we considered other solutions to compress the hierarchical lineage  
68 designations e.g. converting them to hexadecimal, using combinations of letters and numbers to  
69 shorten them, using letters to define the main sub-lineages and then define clusters of isolates  
70 with numbers, but all these attempts implied a loss of information or making the naming system  
71 even more complex to read. We note that the SARS-CoV2 genomic surveillance community has  
72 noted similar challenges to naming strains and clades and have expressed challenges with  
73 appropriate naming that often require long cumbersome names<sup>1</sup>.

74  
75 We now discuss these points in the main text (revised text highlighted):  
76 "To better classify *Mtb* isolates in the context of the global *Mtb* population structure, we developed  
77 a hierarchical sub-lineage naming scheme (Suppl. File 2) [...]. This proposed system overcomes  
78 two major shortcomings of the existing schemas: same-level sub-lineages are never overlapping  
79 (unlike the system of Stucki *et al.*<sup>2</sup> sub-lineage 4.10 includes sub-lineages 4.7–4.9), and the  
80 names reflect both phylogenetic relationships and genetic similarity (unlike *semantic* naming such  
81 as the "Asia ancestral" lineage in the system of Shitikov *et al.*<sup>3</sup>). Further, this naming system can  
82 be standardized to automate the process of lineage definition. These advantages come at the  
83 price of long sublineage names in the case of complex phylogenies (e.g. for L4, sub-lineage 4.10  
84 gets the lineage designation 4.2.1.1.1.1.1.1). For compatibility with naming conventions already  
85 in use and to keep names as short as possible, we designed a second, shorthand, naming system  
86 which expands the Coll *et al.* lineage schema by adding new subdivisions and differentiating  
87 between sub-lineages and internal groups. For instance, sublineage 4.3.1 is designated as 4.3.i1,  
88 informing the user that this is an internal group of sublineage 4.3. To simplify the use of the

89 hierarchical naming schema and the updated shorthand schema, we provide a table that  
90 compares them side by side along with naming systems currently in use (Suppl. File 2).

91  
92

93 2. The brevity of the discussion does not provide sufficient interpretation or context for the work.  
94 For example, the identification of the geographically restricted 1.1.1.2.i1 internal group in Malawi  
95 is interesting, but do the authors have any hypothesis as to why the lineage is so localised? At  
96 the moment the finding is just stated with only superficial interpretation.

97

98 Author' s Response:

99 In response to the reviewers comment we have now substantially revised the discussion around  
100 the identification of the internal group in Malawi. We performed an approximate molecular dating  
101 and drew more on the literature for the context of this group and its origins. This is described in  
102 the quoted text of the manuscript below. We also added a new **Supplementary Figure 3** to  
103 show in detail the phylogenetic context of sub-lineage 1.1.1.2.i1 (now named 1.1.3.i1 in the  
104 shorthand designation).

105

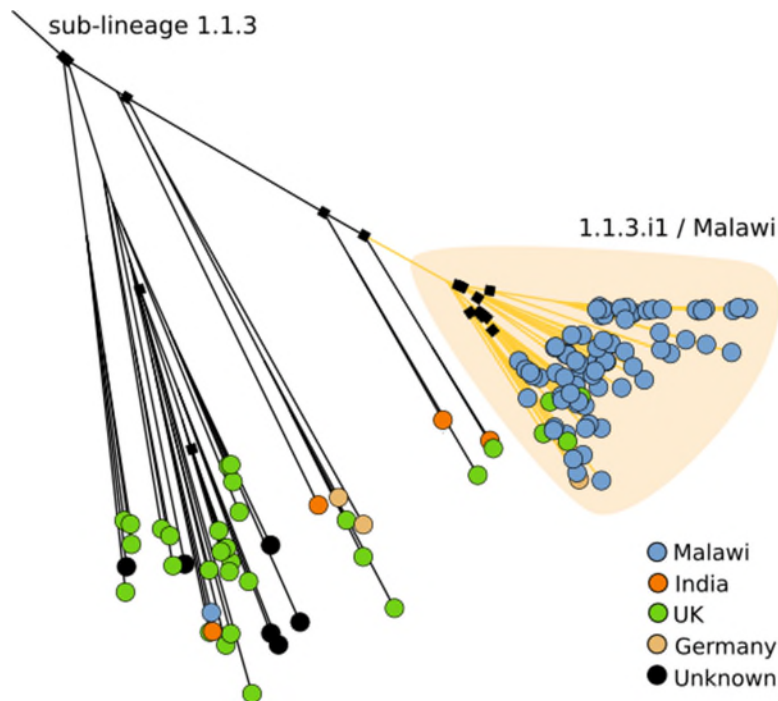

106  
107

108 Suppl. Figure 3. Phylogenetic context of the internal sub-lineage 1.1.3.i1 / Malawi.

109

110 We have also added the following text to the results section:

111 We [...] detected an internal group of 91 isolates (1.1.3.i1) characterized by a long defining branch  
112 in the phylogeny (corresponding to 82 SNSs), a high  $F_{ST}$  (0.48), and geographically restricted to  
113 Malawi (85/91, 93% isolates, Fig. 1 and Suppl. Fig. 3). We approximated the time to the most  
114 recent common ancestor (tMRCA, Methods) of this group at c1497 to 1754.

115

116 The following text has been added to the discussion:  
117 We found an internal sub-lineage of 1.1 (1.1.3.i1) that was found almost exclusively in Malawi  
118 (85/91 isolates) with nearest neighbors isolated from India. The tMRCA of this group dates back  
119 to a point in time between c1497 and c1754. Recent work examining the evolutionary history of  
120 L1 concluded that its origin was most likely in South Asia with a tMRCA estimated in the 12th  
121 century AD<sup>4</sup>. Dissemination of L1 out of South Asia may have been related to increase in maritime  
122 trade between the continents in this era including seasonal trade following the monsoon season  
123 between South Asia and East/Southern Africa. In this study, a group of isolates belonging to sub-  
124 lineage 1.1.3 was defined, the vast majority of which are from Malawi, consistent with our results.  
125 European contact with the autochthonous populations in South Eastern Africa is estimated to  
126 have taken place in the late 15th century, around the time of origin of sublineage 1.1.3.i1. Despite  
127 the opportunity for dissemination mediated by trade and colonization into Europe and other  
128 continents we observe an unusual pattern of geographic restriction of this group of isolates,  
129 consistent with a specialist phenotype. This supports the idea that this is a candidate lineage with  
130 adaptation to a specific human genetic background in this region of Africa through co-evolution.  
131 This observation can be confirmed as more extensive and systematic pathogen whole genome  
132 sequencing becomes available from Sub-Saharan Africa.

133  
134 3. In a similar vein, the evidence for geographical restriction of lineages being a function of co-  
135 evolution of the pathogen with local human populations is merely repeating an oft stated  
136 observation from others. Given that the target journal is Nat Comms, I would like to have seen  
137 some attempt at providing more evidence that could substantiate these claims. Instead we are  
138 told that “confirmation of this observation requires control for TB exposure and differences in  
139 contact networks using epidemiological data”. I think we all realise that there is a need for epi  
140 metadata to substantiate these claims, which is why it would be good to provide it. Of course, the  
141 availability of (good) metadata is one of the major constraints in placing pathogen wgs data in a  
142 broader context, but it would have been nice to know whether the authors have tried to obtain  
143 such epi data, or their plans to explore this.

144  
145 Author's Response:  
146 We thank the reviewer for this comment. To our knowledge the prior published work on  
147 geographic restriction of TB lineage is sparse and limited to Lineage 4. This is the first time that  
148 this notion is evaluated at this scale across the Mtb phylogeny. We have adapted new metrics to  
149 quantify geographic restriction and criteria to do so, and we show that there is only a weak  
150 correlation the Simpson index and the number of isolates ( $\rho = 0.34$ ,  $p\text{-value} = 0.03$ ), suggesting  
151 that specialists are not observed only due to lower sampling.

152  
153 Although we don't have data on TB exposure of the hosts from which the Mtb samples were  
154 isolated, we do validate the geographic distribution of sub-lineages among samples collected  
155 systematically for surveillance by the World Health Organization across five countries. This is the  
156 first time that such systematically collected isolates are used to assess phylogeography of Mtb,  
157 previous studies only focused on convenience samples.

158



159 We explored the possibility of gathering data on exposure and other epidemiological parameters  
160 to link to the whole genome sequences but this would involve a timeline of years which is not  
161 compatible with reasonable publication times. However, this project has prompted us to go  
162 towards the direction pointed out by the reviewer and we started a new project in which we will  
163 gather both genome sequence data and epidemiological data (Pending NIH/NIAID R21  
164 AI154089-01A1) to study how diversity in mycobacterial genes could mediate adaptation to  
165 humans of different ancestry or their environments.

166  
167 Minor

168 1. As a case in point re by point above, the ease of making a 'number' error is shown in the  
169 Introduction where the authors state "We identify and validate 22 novel sub-lineages and 8  
170 additional internal groups, including 6 in L1 and 4 in L3..", while in the Discussion we are told "We  
171 describe 7 and 4 new sub-lineages/internal groups, respectively, for (L1 and L3)". Is it 6 or 7 new  
172 sub-lineages in L1? I believe it is 6.

173

174 Authors Response:

175 The confusion here is due to the definitions of sub-lineage and internal group. We find 6 new sub-  
176 lineages in L1, plus an internal group (1.1.3.i1), bringing the total number of new L1 groups  
177 defined here to 7. In the introduction section our intent was to report the number of sub-lineages,  
178 but it is not clear from our sentence and we apologize for this. To make the text more uniform, we  
179 listed the total number of groups in the introduction as we do in the discussion:

180

181 "We identify and validate 22 novel sub-lineages and 8 additional internal groups (*i.e.* genetically  
182 divergent groups found in sub-lineages that cannot be further partitioned in a hierarchical fashion  
183 according to our criteria), including 7 in L1 and 4 in L3, and expand the SNS typing barcode to 95  
184 sites".

185

186 2. The lack of line numbers on the manuscript makes it difficult for a reviewer to highlight areas  
187 needing correction/comments.

188

189 Author's Response: We sincerely apologize regarding this omission. We fixed this issue and  
190 added the line numbers to all files.

191

192 3. There are some typos in the References (e.g. 6, 7, 40)

193

194 Author's Response: We corrected the typos. Reference #40 (now 49) is a reference to an arXiv  
195 pre-print, which is the most appropriate according to the authors of the software (see  
196 <https://github.com/lh3/bwa>).

197

198 Reviewer #2 (Remarks to the Author):

199

200 In Freschi et al, the authors used multiple datasets of previously published whole genomes of M.  
201 tuberculosis clinical isolates and performed various analyses to refine the phylogeny of this  
202 important pathogen. In particular, this work extends prior understanding of M. tuberculosis

203 phylogeny and population structure with respect to sublineages and define additional sub-  
204 lineages and internal groups that had previously not been named. They propose a rational  
205 nomenclature for *M. tuberculosis* sublineages, and identify a single nucleotide substitution (SNS)  
206 that can be used to identify these sublineages for future analyses. Lastly, they performed a  
207 terminal branch length analysis of *Mtb* lineages 1-4, and extrapolate differential branch length  
208 findings to transmissibility these lineages.

209  
210 While much of the analyses are descriptive, this paper does modestly improve our current  
211 understanding of the TB phylogeny and propose a useful tool for sublineage nomenclature. There  
212 are a few clarifications that would enhance this manuscript in its current form.

213  
214 Major comments:

215 1. Even in a seemingly large dataset of over 10K *Mtb* isolates, when over 1 million people on  
216 the planet are known to have TB disease each year, there are issues with sampling biases that  
217 must be considered. This is a particular issue in this study, which utilizes only previously  
218 published genomes that have been sequenced for other purposes. While the authors  
219 acknowledge that sampling bias is a limitation, it is not clear that sampling bias has been  
220 minimized. For example, how was this sampling issue addressed in the distribution of terminal  
221 branch length analysis?

222  
223 [Authors Response:](#)

224 [We thank the reviewer for raising this point. Minimizing sampling bias was a key scientific priority](#)  
225 [for us as we conducted the analysis. To achieve this we relied on the largest dataset of isolates](#)  
226 [available to us. For the phylogenetic analysis and lineage definitions we specifically collected](#)  
227 [isolates that had known antibiotic resistance phenotypes as a major source of biased sampling is](#)  
228 [over-representation of resistance in published datasets. Accordingly we stratified the analysis by](#)  
229 [resistance phenotype, assessing sub-lineages only among susceptible isolates and reserving the](#)  
230 [phylogeny of resistant isolates for validation. We also specifically include a third dataset](#)  
231 [systematically collected for surveillance purposes by five countries under the guidance of the](#)  
232 [World Health Organization](#) <sup>5</sup>.

233  
234 [We also pooled data across geographies for inference regarding relative transmissibility of the 4](#)  
235 [major lineages. Hence our measure of transmissibility is relative between lineages and averaged](#)  
236 [over countries. This averaging and relative measurement of transmissibility minimizes the effect](#)  
237 [of bias as there is no reason that sampling bias will preferentially affect \*Mtb\* isolates from a specific](#)  
238 [lineage that is only known after sequencing.](#)

239  
240 [We further used three metrics \(terminal branch lengths, node-to-tip distances for all internal](#)  
241 [nodes, proportions of isolates belonging to a given lineage as a function of pairwise SNS](#)  
242 [difference\) to look at transmissibility and all the three metrics show similar results. Finally, when](#)  
243 [stating our conclusions we were careful to not over step our interpretation of the results and we](#)  
244 [focus on the largest differences i.e. between L1 and \(L2 or L4\) and between L3 and \(L2 or L4\).](#)  
245 [The phylogenetic differences between \(L2 or L4\) and \(L1 or L3\) are highly statistically significant](#)  
246 [with P-values < 3.6 ×10<sup>-6</sup>.](#)

247  
248 In order to further confirm that the measured differences in transmissibility are not due to sampling  
249 bias we performed two new analyses: (1) we compared the terminal branch lengths distributions  
250 of susceptible isolates only, belonging to the major Mtb lineages (4,939 isolates), This would  
251 eliminate any oversampling bias of drug resistance. And (2) we compared the terminal branch  
252 lengths distributions between the major Mtb lineages using the WHO dataset, where the isolates  
253 have been systematically sampled to reliably represent the entire population of TB patients in five  
254 countries. We find that the order of transmissibility holds in these validation analyses with L2 or  
255 L4 being more transmissible than L3 and L1 respectively.

256  
257 We report describe these results in the Results section with more details in the Supplement  
258 section:

259  
260 Results text added:

261 “To confirm that the measured transmissibility differences are not due to sampling bias in the  
262 source data, we compared the distributions of terminal branch lengths for the four major lineages  
263 using the susceptible isolates only (n = 4,939/9,584; dataset with curated phenotypes) and using  
264 the Zignol *et al.* dataset, where the isolates have been randomly sampled in five countries. In both  
265 cases we found that L4 and L2 have the shortest median terminal branch lengths and L1 the  
266 longest. In the Zignol *et al.* dataset we also found that L4 and L2 terminal branch lengths were  
267 shorter than L3’s (Supplementary information, Suppl. Fig. 23-24).”

268  
269 Supplement text added:

270 “To confirm that the measured transmissibility differences are not due to sampling bias in the  
271 source data, we compared the distributions of terminal branch lengths for the four major lineages  
272 using the susceptible isolates only (n = 4,939/9,584; dataset with curated phenotypes). We found  
273 L4 to have the shortest median terminal branch length and L1 the longest (median terminal branch  
274 length: L4=8.7×10<sup>-5</sup>, L2=10.1×10<sup>-5</sup>, L3=9.8×10<sup>-5</sup>, L1=17×10<sup>-5</sup>); two sided pairwise Wilcoxon rank  
275 sum tests were significant at the multiple testing corrected threshold of P-value<0.001 except  
276 between L2 vs L3, P-value = 0.05; Suppl. Fig. 23. The lack of significant difference between L2  
277 and L3 in this drug susceptible dataset is likely due to smaller sample size. The fact that L2 is  
278 recognized to have a higher rate of drug resistance than other lineages resulted in more filtering  
279 of L2 isolates when we restricted to the drug susceptible subset <sup>6</sup>. We also compared the  
280 distributions of terminal branch lengths between the four major lineages using the Zignol *et al.*  
281 dataset, where the isolates have been randomly sampled in five countries. In this case we again  
282 found that L4 and L2 have the shortest median terminal branch length and L1 the longest (median  
283 terminal branch length: L2=11.8×10<sup>-5</sup>, L4=16.1×10<sup>-5</sup>, L3=29.3×10<sup>-5</sup>, L1=37×10<sup>-5</sup>, respectively; all  
284 pairwise two sided Wilcoxon rank sum tests significant with P-values<0.001; Suppl. Fig. 24).”

285  
286 2. Inclusion of a summary table of the M. tuberculosis isolates included in each analysis of this  
287 study would be helpful to understand the total numbers of isolates from each prior investigation,  
288 from each country, the distribution of drug-resistant strains, and distribution of lineages and  
289 sublineages to allow the reader to understand the sampling and potential biases. While some of

290 this information is embedded within supplemental Files 1, 4 and 5, these are currently unwieldy  
291 and require the reader to tabulate summary numbers of interest.

292

293 **Authors Response:**

294 We now include a Supplementary File (Suppl. File 7) with summary tables that show the  
295 distribution of the isolates by country, main lineage and sub-lineage. The distribution of the  
296 isolates. Here are two excerpt from these tables as the full tables are too long to display here.:

297

298 **Sheet 1 / Excerpt from distribution of the isolates by country for the three datasets used in this  
299 work.**

300

| <b>country</b> | <b>9K_with_phenotypes</b> | <b>ZIGNOL</b> | <b>NCBI</b> |
|----------------|---------------------------|---------------|-------------|
| #              | 1158                      | 0             | 0           |
| Albania        | 0                         | 0             | 9           |
| Argentina      | 0                         | 0             | 169         |
| Australia      | 0                         | 0             | 77          |
| Azerbaijan     | 1                         | 707           | 135         |
| Bangladesh     | 0                         | 635           | 25          |
| Belarus        | 136                       | 0             | 37          |

301

302 **Sheet 2 / Excerpt from distribution of the isolates by sub-lineages for the three datasets used in  
303 this work.**

304

| <b>lineage</b> | <b>9K_with_phenotypes</b> | <b>NCBI</b> | <b>ZIGNOL</b> |
|----------------|---------------------------|-------------|---------------|
| 1.1            | 0                         | 2           | 0             |
| 1.1.1          | 0                         | 12          | 0             |

|          |     |     |     |
|----------|-----|-----|-----|
| 1.1.1.1  | 33  | 362 | 2   |
| 1.1.1.2  | 4   | 4   | 0   |
| 1.1.2    | 264 | 277 | 38  |
| 1.1.3    | 49  | 71  | 240 |
| 1.1.3.i1 | 91  | 107 | 1   |

305  
306  
307  
308  
309  
310  
311  
312  
313  
314  
315  
316  
317  
318  
319  
320  
321

Minor comments:  
1. It would be helpful to include a table of the new sublineage naming system to prior naming systems to ease the comparison with the published literature

Authors Response:  
We have now added two more tables (Excel sheets) to Suppl. File 2 to facilitate the comparison between the different naming systems (“cmp\_schemes” and “cmp\_schemes\_all\_nodes”). The former reports the designations for recent sub-lineages (i.e. the subdivisions that provide the highest resolution in our naming scheme and are the closest ones to the tips of the tree; e.g. 1.2.2.1) in the different naming schemes; the latter reports the designations of all sub-lineages in the different naming systems, meaning that it will list, for instance, the designations for 1, 1.2, 1.2.2 and 1.2.2.1. The updated lineage shorthand, lineage\_hierarchical and two previously published schema (Coll et al and Shitikov et al) are compared.

Here is an excerpt of the table “cmp\_schemes”:

| lineage | lineage_hierarchical | coll  | shitikov      |
|---------|----------------------|-------|---------------|
| 1.2.2.1 | 1.2.2.1              | 1.2.2 | NA            |
| ...     | ...                  | ...   | ...           |
| 2.1     | 2.1                  | 2.1   | proto_beijing |
| ...     | ...                  | ...   | ...           |
| 4.1     | 4.1                  | 4.1   | NA            |

|      |                 |         |    |
|------|-----------------|---------|----|
| 4.5  | 4.2.1.1.2       | 4.5     | NA |
| 4.11 | 4.2.1.1.1.1.2   | 4       | NA |
| 4.10 | 4.2.1.1.1.1.1.1 | 4.[7-9] | NA |

322  
323  
324  
325

Here is an extract of the table “cmp\_schemes\_all\_nodes”:

| lineage | lineage_hierarchical | coll  | shitikov |
|---------|----------------------|-------|----------|
| 1       | 1                    | 1     | NA       |
| 1.1     | 1.1                  | 1.1   | NA       |
| 1.2     | 1.2                  | 1.2   | NA       |
| 1.2.2   | 1.2.2                | 1.2.2 | NA       |
| 1.2.1   | 1.2.1                | 1.2.1 | NA       |
| 1.2.2.1 | 1.2.2.1              | 1.2.2 | NA       |

326  
327

2. The conclusion that L4 is as or more transmissible than L2 raises more questions than answers as this appears to be differ from the conclusions of other published studies that are cited herein on the global dominance of the Beijing strains.

331

#### Author’s Response

332

We thank the reviewer for raising this point. We want to note that previous works compared the different Mtb lineages at the local level, meaning that they have a different and partial sub-lineage coverage. We also note that both L2 and L4 are recognized to contain the vast majority of the known Mtb “generalist” sub-lineages, which supports the idea of both these lineages being highly transmissible.

337

338

Our conclusions are not in contrast with the previous works, since we concluded that L2 and L4 are more transmissible than L3 and L1, with L1 being the least transmissible Mtb lineage. In our response above on minimizing sampling bias we describe that validation we have conducted to confirm the associations we observe between transmissibility across the 4 major Mtb lineages are

339

340

341

342

343 robust. Further existing reports in the literature vary on the relative transmissibility of the four  
344 lineages with L1 and L3 being less studied. Several reports have failed to identify differences in  
345 transmissibility between L2 and L4 e.g. PMID: 26224845, PMID: 24849817, PMID: 29422032

346

347 Our dataset is largest to date measuring transmissibility across lineages and across  
348 geographies and we believe this adds to the existing local reports on this question.

349

350 We have now added more discussion on differential transmissibility of the four lineages to the  
351 discussion section that currently reads:

352

353 “We find evidence supporting the *Mtb*-human co-evolution hypothesis and its corollary of lineage  
354 differential adaptation<sup>2</sup>, including a spectrum of transmissibility across the four major *Mtb*  
355 lineages. We characterize L4 and L2 as the most transmissible, L1 as the least transmissible one  
356 and L3 showing an intermediate level of transmissibility using different phylogenetic metrics. This  
357 is consistent with previous studies that have identified L2 sub-lineages as more transmissible than  
358 L1 in Vietnam <sup>7</sup> and Malawi <sup>8</sup>. This result also supports several reports which have failed to  
359 identify differences in transmissibility between L2 and L4 <sup>9–11</sup>. In order to test the robustness of  
360 our findings and minimize the potential sampling bias we also compared the transmissibility of the  
361 major *Mtb* lineages using a the pan-susceptible isolates form our dataset with curated phenotypes  
362 (n = 4,939/9,584) and using a dataset where isolates were randomly sampled in five countries  
363 and we got similar results. Finally, our results are also in line with a larger number of  
364 geographically unrestricted ‘generalist’ L4 and L2 sub-lineages observed (compared with L3 or  
365 L1).”

366

## 367 REVIEWER COMMENTS

368

369 Reviewer #3 (Remarks to the Author):

370

371 The manuscript reads well and it represents a real advance in the TB molecular epidemiology  
372 and phylogeography field.

373

374 Important notions are discussed, and newly defined TB sub-lineages are proposed.

375

376 Authors’ Response: We thank the reviewer for their kind words and thoughts that have helped us  
377 improve the manuscript.

378

379 However, I have a few minor remarks:

380 On page 5 (line 166) Please be more precise about the "species other than *Mtb*".

381

382 Authors’ Response:

383 We now made clear that with the appropriate barcode fast-lineage-caller can be used for any  
384 microbial species: “The tool is generalizable and can manage additional barcodes defined by the  
385 user to type the core genome of potentially any bacterial species.”

386

387 It would be great to provide geographic (or country) distribution for each identified SNS TB sub-  
388 lineage.

389  
390 **Authors Response:**

391 We added tables (Suppl. File 7) and maps (Suppl. File 5) that show the world distribution of  
392 each of the sub-lineages/internal groups described in our work.

393  
394 It is not clear how the "fast-lineage-caller" has been validated and compared to other tools.  
395 Could you please provide a supplemental table for it?

396  
397 **Authors Response:**

398 Fast-lineage-caller is a Software package written for Python that allows lineage calling from .vcf  
399 files using different SNP schemes.

400  
401 It can be downloaded from <https://github.com/farhat-lab/fast-lineage-caller>, and the basic syntax  
402 is the following:

403  
404 `fast-lineage-caller my_isolate.vcf`

405  
406 The output is a table of the lineage calls with the different SNP schemes:

407

| Isolate     | coll2014     | freschi2020 | lipworth2019 | shitikov2017             | stucki2016 |
|-------------|--------------|-------------|--------------|--------------------------|------------|
| SAMEA968141 | lineage2.2.1 | 2.2.1.1.1   | beijing      | lin2.2.1,asian_african_2 | NA         |

408

409 The package can also provide information on how many SNPs support the lineage calls (if an  
410 option is selected):

411

| Isolate     | coll2014          | freschi2020    | lipworth2019     | shitikov2017                       | stucki2016 |
|-------------|-------------------|----------------|------------------|------------------------------------|------------|
| SAMEA968141 | lineage2.2.1(1/1) | 2.2.1.1.1(1/1) | beijing(296/296) | lin2.2.1(3/3),asian_african_2(2/2) | NA         |

412

413 The package includes all the most used/up-to-date SNP schemes, while the other available  
414 software mostly include a single SNP scheme. We will continue to add SNP schemes when new  
415 studies are published and add new features as well (i.e. lineage calls from FASTA/Q files, scripts  
416 to import/export lineage schemes from/to other tools, RD and INDEL schemes).

417

418 On page 8 (line 290) "... one from South-East Asia" (please be more precise on the location).

419



420 Authors Response: we now specify in the text the countries where sub-lineage 1.1.1.1.1 is  
421 found:

422 "We find two new candidate geographically restricted sub-lineages/internal groups, one of them  
423 from Malawi and one from South-East Asia (Vietnam and Thailand)."

424

425 Page 9, lines 336-337, could you please provide the corresponding lineage for each NCBI  
426 Reference sequence (NC...../L1, NC...../L2, ...)

427

428 Authors Response: we added the corresponding lineages as suggested by the reviewer:

429 "For this purpose we set up a custom Kraken database, to reduce the memory requirements of  
430 the default database (Reference sequences: NC\_009565.1 / L4, NC\_000962.3 / L4,  
431 NC\_017524.1 / L4, NC\_002755.2 / L4, NC\_021054.1 / L2). "

432

433 Furthermore, regarding data on L1 and L3, it would be interesting to mention recent studies on  
434 the subject (<https://doi.org/10.1101/2020.10.20.346866> ,  
435 <https://doi.org/10.1371/journal.pone.0219706> , <https://doi.org/10.1111/mec.15120>)

436

437 Authors Response:

438 We thank the reviewer for pointing out these references, we now cite and discuss these studies  
439 in our main text as detailed below. We note that some of these references overlap with new  
440 literature we cited to expand on the Malawi L1.1.3.i1 lineage in response to Reviewer 1's  
441 comments.

442

### 443 Introduction

444 [...] L1 and L3 diversity is less understood as these lineages are most prevalent in countries where  
445 pathogen sequencing has been less widely applied, but this is rapidly changing due to the  
446 increasing sequencing capacity in high-burden TB settings and supported by international  
447 research collaborations <sup>4,5</sup>. The population structure of L1 and L3 is less understood as these  
448 lineages are most prevalent in countries where pathogen sequencing had been less widely  
449 applied. Recently, studies fueled by increasing sequencing capacity in high-burden TB settings  
450 have begun to evaluate the evolutionary history of L1 and L3 including the role of migration and  
451 dispersal in driving their prevalence in different parts of the world<sup>4,5,12,13</sup>. [...]

452

### 453 Discussion

454 We found an internal sub-lineage of 1.1 (1.1.3.i1) that was found almost exclusively in Malawi  
455 (85/91 isolates) with nearest neighbors isolated from India. The tMRCA of this group dates back  
456 to a point in time between c1497 and c1754. Recent work examining the evolutionary history of  
457 L1 concluded that its origin was most likely in South Asia with a tMRCA estimated in the 12th  
458 century AD<sup>4</sup>. Dissemination of L1 out of South Asia may have been related to increase in maritime  
459 trade between the continents in this era including seasonal trade following the monsoon season  
460 between South Asia and East/Southern Africa. In this study, a group of isolates belonging to sub-  
461 lineage 1.1.3 was defined, the vast majority of which are from Malawi, consistent with our results.  
462 European contact with the autochthonous populations in South Eastern Africa is estimated to  
463 have taken place in the late 15th century, around the time of origin of sublineage 1.1.3.i1. Despite

464 the opportunity for dissemination mediated by trade and colonization into Europe and other  
465 continents we observe an unusual pattern of geographic restriction of this group of isolates,  
466 consistent with a specialist phenotype. This supports the idea that this is a candidate lineage with  
467 adaptation to a specific human genetic background in this region of Africa through co-evolution.  
468 This observation can be confirmed as more extensive and systematic pathogen whole genome  
469 sequencing becomes available from Sub-saharan Africa.  
470

- 471 1. Callaway, E. 'A bloody mess': Confusion reigns over naming of new COVID variants.  
472 *Nature* vol. 589 339 (2021).
- 473 2. Stucki, D. *et al.* Mycobacterium tuberculosis lineage 4 comprises globally distributed and  
474 geographically restricted sublineages. *Nat. Genet.* **48**, 1535–1543 (2016).
- 475 3. Shitikov, E. *et al.* Evolutionary pathway analysis and unified classification of East Asian  
476 lineage of Mycobacterium tuberculosis. *Sci. Rep.* **7**, 9227 (2017).
- 477 4. Menardo, F. *et al.* Local adaptation in populations of Mycobacterium tuberculosis endemic  
478 to the Indian Ocean Rim. *Cold Spring Harbor Laboratory* 2020.10.20.346866 (2020)  
479 doi:10.1101/2020.10.20.346866.
- 480 5. Zignol, M. *et al.* Genetic sequencing for surveillance of drug resistance in tuberculosis in  
481 highly endemic countries: a multi-country population-based surveillance study. *Lancet*  
482 *Infect. Dis.* **18**, 675–683 (2018).
- 483 6. Ektefaie, Y., Dixit, A., Freschi, L. & Farhat, M. R. Globally diverse Mycobacterium  
484 tuberculosis resistance acquisition: a retrospective geographical and temporal analysis of  
485 whole genome sequences. *The Lancet Microbe* **2**, e96–e104 (2021).
- 486 7. Holt, K. E. *et al.* Frequent transmission of the Mycobacterium tuberculosis Beijing lineage  
487 and positive selection for the EsxW Beijing variant in Vietnam. *Nat. Genet.* **50**, 849–856  
488 (2018).
- 489 8. Guerra-Assunção, J. A. *et al.* Large-scale whole genome sequencing of M. tuberculosis  
490 provides insights into transmission in a high prevalence area. *Elife* **4**, (2015).
- 491 9. Nebenzahl-Guimaraes, H., Verhagen, L. M., Borgdorff, M. W. & van Soolingen, D.

- 492           Transmission and Progression to Disease of Mycobacterium tuberculosis Phylogenetic  
493           Lineages in The Netherlands. *J. Clin. Microbiol.* **53**, 3264–3271 (2015).
- 494   10. Nebenzahl-Guimaraes, H., Borgdorff, M. W., Murray, M. B. & van Soolingen, D. A novel  
495           approach - the propensity to propagate (PTP) method for controlling for host factors in  
496           studying the transmission of Mycobacterium tuberculosis. *PLoS One* **9**, e97816 (2014).
- 497   11. Peres, R. L. *et al.* Risk factors associated with cluster size of Mycobacterium tuberculosis  
498           (Mtb) of different RFLP lineages in Brazil. *BMC Infect. Dis.* **18**, 71 (2018).
- 499   12. Couvin, D., Reynaud, Y. & Rastogi, N. Two tales: Worldwide distribution of Central Asian  
500           (CAS) versus ancestral East-African Indian (EAI) lineages of Mycobacterium tuberculosis  
501           underlines a remarkable cleavage for phylogeographical, epidemiological and  
502           demographical characteristics. *PLOS ONE* vol. 14 e0219706 (2019).
- 503   13. O'Neill, M. B. *et al.* Lineage specific histories of Mycobacterium tuberculosis dispersal in  
504           Africa and Eurasia. *Molecular Ecology* vol. 28 3241–3256 (2019).

505

**<b>REVIEWERS' COMMENTS</b>**

Reviewer #1 (Remarks to the Author):

The authors have addressed all the points I raised in my original review, providing extra analysis and clarifying issues. I thank them for their robust and detailed responses to all points raised.

Reviewer #2 (Remarks to the Author):

With this revised manuscript, the authors have adequately addressed my prior concerns.

Reviewer #3 (Remarks to the Author):

All comments or suggestions made have been addressed by the authors. I have no other comments or suggestions. This article provides interesting information on MTBC, and a useful bioinformatics tool helping users for a better understanding of TB.
